# Supplementary material
Source: publisher site journal article supplement (https://www.dovepress.com/article/281198)
Supplement: Supplementary file 1 [file get_supplementary_file.php]

**Urinary metabolomic profiling reveals biological pathways and predictive signatures associated with childhood asthma**

**Supplementary materials**

**Supplementary Figure 1. The PCA-3D score graph of urine metabolic profiles of the asthma group and health controls.**


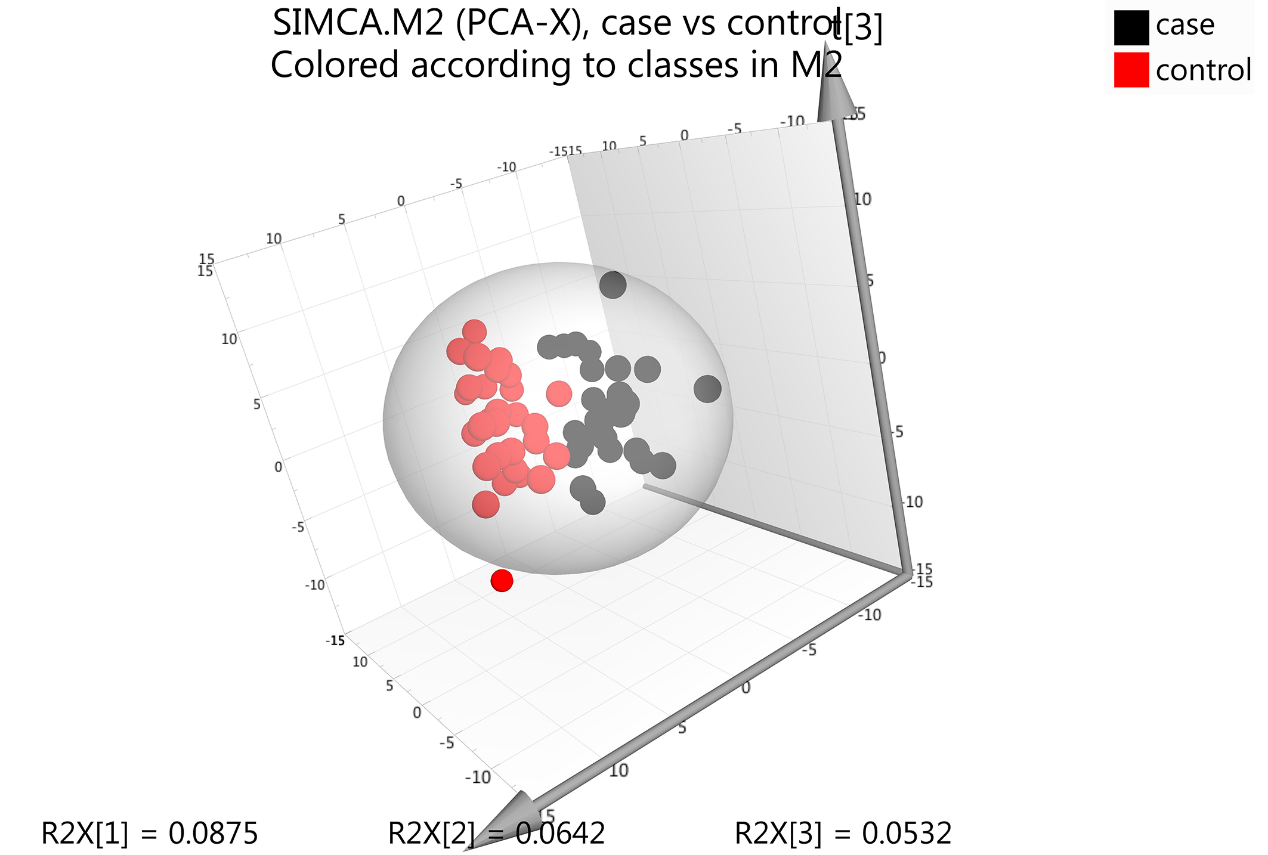


**Supplementary Figure 2. KEGG pathway analysis of the differentially expressed metabolites reported in Comhair SA et al. [J Immunol. 2015;195(2):643-650.]** (A) metabolic pathway bubble chart: (a) caffeine metabolism; (b) sphingolipid metabolism; (c) glycerophospholipid metabolism; (d) primary bile acid biosynthesis. (B) metabolic pathway enrichment analysis histogram graph.


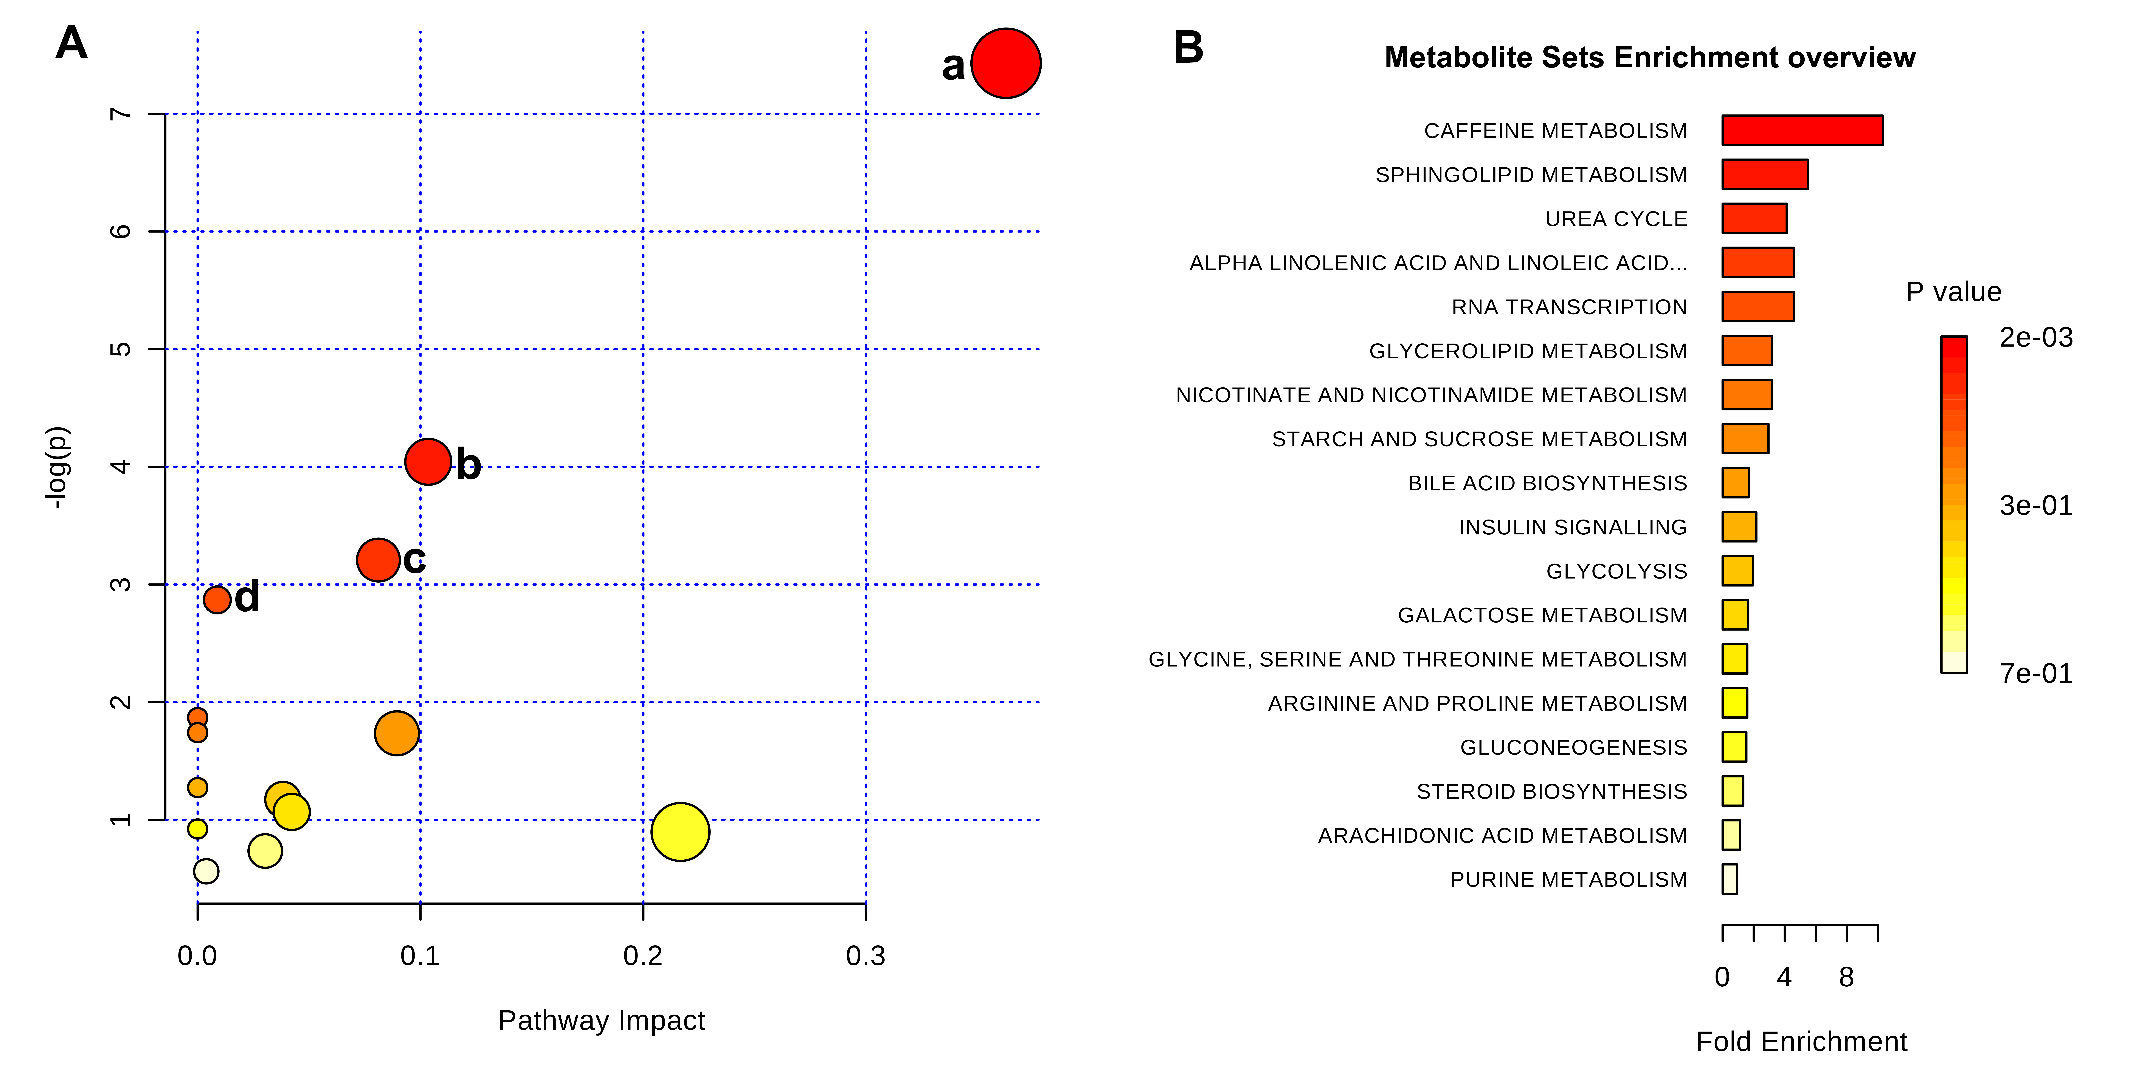


| **Supplementary Table 1. ROC analysis of differential metabolites between asthmatic and control subjects** | | |
| --- | --- | --- |
| Peak | auc.ROC.auc | wilcox.p |
| L-Allothreonine 1 | 0.719 | 0.003 |
| stearic acid | 0.696 | 0.009 |
| succinic acid | 0.770 | 0.000 |
| 2-hydroxybutanoic acid | 0.969 | 0.000 |
| azelaic acid | 0.711 | 0.005 |
| Gentiobiose 2 | 0.699 | 0.008 |
| tyramine | 0.696 | 0.009 |
| leucine | 0.737 | 0.001 |
| D-Altrose 1 | 0.748 | 0.001 |
| D-erythro-sphingosine 1 | 0.654 | 0.040 |
| Citraconic acid 4 | 0.786 | 0.000 |
| valine | 0.652 | 0.043 |
| uric acid | 0.670 | 0.023 |
| methionine 1 | 0.708 | 0.005 |
| 3,4-dihydroxycinnamic acid | 0.741 | 0.001 |
| Purine riboside | 0.625 | 0.098 |
| malonic acid 1 | 0.790 | 0.000 |
| cystine | 0.663 | 0.030 |
| Erythrose 1 | 0.646 | 0.053 |
| Lactamide 1 | 0.744 | 0.001 |

| **Supplementary Table 2. Pathway analysis of the differential metabolites** | | | | | |
| --- | --- | --- | --- | --- | --- |
| Pathway | Expected | Hits | Raw p | =-LOG(p) | Impact |
| Sphingolipid metabolism | 0.34275 | 4 | 0.0003027 | 8.1028 | 0.10349 |
| Citrate cycle (TCA cycle) | 0.2742 | 3 | 0.0022845 | 6.0816 | 0.07491 |
| Valine, leucine and isoleucine biosynthesis | 0.37017 | 3 | 0.0054904 | 5.2047 | 0.03392 |
| Propanoate metabolism | 0.47985 | 3 | 0.011403 | 4.4739 | 0.00134 |
| Aminoacyl-tRNA biosynthesis | 1.0283 | 4 | 0.017943 | 4.0206 | 0.05634 |
| Tyrosine metabolism | 1.042 | 4 | 0.018758 | 3.9761 | 0.01666 |
| Glycine, serine and threonine metabolism | 0.65808 | 3 | 0.026708 | 3.6228 | 0.13651 |
| Glyoxylate and dicarboxylate metabolism | 0.6855 | 3 | 0.029711 | 3.5162 | 0.05711 |
| Cysteine and methionine metabolism | 0.76776 | 3 | 0.039754 | 3.225 | 0.06292 |
| Alanine, aspartate and glutamate metabolism | 0.32904 | 2 | 0.04169 | 3.1775 | 0.00285 |
| Valine, leucine and isoleucine degradation | 0.5484 | 2 | 0.10297 | 2.2733 | 0.02232 |
| Butanoate metabolism | 0.5484 | 2 | 0.10297 | 2.2733 | 0.03545 |
| Galactose metabolism | 0.56211 | 2 | 0.10735 | 2.2317 | 0.01716 |
| Phenylalanine metabolism | 0.61695 | 2 | 0.12535 | 2.0766 | 0 |
| Starch and sucrose metabolism | 0.6855 | 2 | 0.1488 | 1.9051 | 0.12262 |
| Pyrimidine metabolism | 0.8226 | 2 | 0.198 | 1.6195 | 0 |
| Cyanoamino acid metabolism | 0.21936 | 1 | 0.19874 | 1.6157 | 0 |
| Sulfur metabolism | 0.24678 | 1 | 0.22071 | 1.5109 | 0 |
| Pantothenate and CoA biosynthesis | 0.37017 | 1 | 0.31255 | 1.163 | 0 |
| beta-Alanine metabolism | 0.38388 | 1 | 0.32209 | 1.1329 | 0.01119 |
| Pyruvate metabolism | 0.43872 | 1 | 0.35895 | 1.0246 | 0 |
| Glycerolipid metabolism | 0.43872 | 1 | 0.35895 | 1.0246 | 0.0206 |
| Pentose phosphate pathway | 0.43872 | 1 | 0.35895 | 1.0246 | 0.02181 |
| Methane metabolism | 0.46614 | 1 | 0.37664 | 0.97646 | 0.01751 |
| Glycerophospholipid metabolism | 0.53469 | 1 | 0.41883 | 0.87029 | 0.07129 |
| Nicotinate and nicotinamide metabolism | 0.60324 | 1 | 0.45825 | 0.78035 | 0 |
| Fructose and mannose metabolism | 0.65808 | 1 | 0.4879 | 0.71764 | 0.02948 |
| Fatty acid biosynthesis | 0.67179 | 1 | 0.49506 | 0.70307 | 0 |
| Arginine and proline metabolism | 1.0557 | 1 | 0.66049 | 0.41478 | 0 |
| Tryptophan metabolism | 1.0831 | 1 | 0.67004 | 0.40042 | 0 |
| Amino sugar and nucleotide sugar metabolism | 1.2065 | 1 | 0.70989 | 0.34265 | 0 |
| Purine metabolism | 1.2613 | 1 | 0.72606 | 0.32012 | 0.00969 |

| **Supplementary Table 3. Pathway enrichment analysis of the differential metabolites** | | | |
| --- | --- | --- | --- |
| Pathway | expected | hits | Raw p |
| SPHINGOLIPID METABOLISM | 0.6 | 3 | 0.0191 |
| PROTEIN BIOSYNTHESIS | 0.76 | 3 | 0.0365 |
| CITRIC ACID CYCLE | 0.92 | 3 | 0.0598 |
| ASPARTATE METABOLISM | 0.48 | 2 | 0.0797 |
| MITOCHONDRIAL ELECTRON TRANSPORT CHAIN | 0.6 | 2 | 0.118 |
| TYROSINE METABOLISM | 1.52 | 3 | 0.19 |
| METHIONINE METABOLISM | 0.96 | 2 | 0.249 |
| GALACTOSE METABOLISM | 1 | 2 | 0.264 |
| GLYCINE, SERINE AND THREONINE METABOLISM | 1.04 | 2 | 0.279 |
| BETAINE METABOLISM | 0.4 | 1 | 0.337 |
| PHENYLALANINE AND TYROSINE METABOLISM | 0.52 | 1 | 0.414 |
| GLYCEROLIPID METABOLISM | 0.52 | 1 | 0.414 |
| VALINE, LEUCINE AND ISOLEUCINE DEGRADATION | 1.44 | 2 | 0.428 |
| AMMONIA RECYCLING | 0.72 | 1 | 0.524 |
| PROPANOATE METABOLISM | 0.72 | 1 | 0.524 |
| FRUCTOSE AND MANNOSE DEGRADATION | 0.72 | 1 | 0.524 |
| GLUTAMATE METABOLISM | 0.72 | 1 | 0.524 |
| UREA CYCLE | 0.8 | 1 | 0.562 |
| PYRUVATE METABOLISM | 0.8 | 1 | 0.562 |
| ARGININE AND PROLINE METABOLISM | 1.04 | 1 | 0.66 |
| PYRIMIDINE METABOLISM | 1.44 | 1 | 0.777 |
| PURINE METABOLISM | 1.8 | 1 | 0.849 |
